# Supplementary material for: Mutations in STAT3 and IL12RB1 impair the development of human IL-17–producing T cells
Source: PubMed Central journal article supplement — J Exp Med. 2008 Jul 7;205(7):1543–50. doi: 10.1084/jem.20080321 (PMC2442631; doi:10.1084/jem.20080321), 2008-07-07
Supplement: jem.20080321_5.pdf [file jem.20080321_5.pdf]

**Table S1.** Genetic and clinical features of the patients

| Patient        | Syndrome <sup>a</sup> | Gene           | Mutations             | Age (yr) | Sex | Origin   | Infections          |                       |                                |                                  |                | References                  |
|----------------|-----------------------|----------------|-----------------------|----------|-----|----------|---------------------|-----------------------|--------------------------------|----------------------------------|----------------|-----------------------------|
|                |                       |                |                       |          |     |          | <i>Pneumococcus</i> | <i>Staphylococcus</i> | <i>Salmonella</i> <sup>b</sup> | <i>Mycobacteria</i> <sup>c</sup> | <i>Candida</i> |                             |
| 1              | MPPBI                 | <i>IRAK4</i>   | E402X                 | 11       | M   | Spain    | +                   | –                     | –                              | –                                | –              | Ku et al. <sup>d</sup>      |
| 2              | MPPBI                 | <i>IRAK4</i>   | 1-1096_40+23del       | 11       | M   | Israel   | +                   | –                     | –                              | –                                | –              | Ku et al.                   |
| 3 <sup>e</sup> | MPPBI                 | <i>IRAK4</i>   | M1V/1188+520A>G       | 3        | F   | Slovenia | –                   | –                     | –                              | –                                | –              | Ku et al.                   |
| 4              | MPPBI                 | <i>IRAK4</i>   | 1189-1G>T/1188+520A>G | 10       | M   | Hungary  | +                   | –                     | –                              | –                                | –              | Ku et al.                   |
| 5              | MPPBI                 | <i>IRAK4</i>   | Q293X                 | 33       | F   | UK       | +                   | –                     | –                              | –                                | –              | Ku et al.                   |
| 6              | MPPBI                 | <i>IRAK4</i>   | Q293X                 | 28       | M   | Canada   | +                   | –                     | –                              | –                                | –              | Ku et al.                   |
| 7              | MPPBI                 | <i>MYD88</i>   | L93P/R196C            | 4        | F   | Turkey   | +                   | –                     | –                              | –                                | –              | unpublished data            |
| 8              | MPPBI                 | <i>MYD88</i>   | R196C                 | 16       | F   | Portugal | +                   | –                     | +                              | –                                | –              | unpublished data            |
| 9              | MPPBI                 | <i>MYD88</i>   | R196C                 | 10       | M   | Portugal | +                   | +                     | +                              | –                                | –              | unpublished data            |
| 10             | MSMD                  | <i>IL12B</i>   | 297del8               | 7        | M   | Tunisia  | –                   | –                     | <i>Se</i>                      | –                                | –              | This report                 |
| 11             | MSMD                  | <i>IL12B</i>   | 297del8               | 24       | M   | Tunisia  | –                   | –                     | –                              | –                                | –              | This report                 |
| 12             | MSMD                  | <i>IL12RB1</i> | 1791+2T>G             | 12       | F   | Spain    | –                   | –                     | –                              | <i>Mtb</i>                       | –              | Caragol et al. <sup>f</sup> |
| 13             | MSMD                  | <i>IL12RB1</i> | 1791+2T>G             | 20       | F   | Spain    | –                   | –                     | <i>Se</i>                      | <i>Mtb</i>                       | –              | Caragol et al.              |
| 14             | MSMD                  | <i>IL12RB1</i> | 1791+2T>G             | 22       | F   | Spain    | –                   | –                     | –                              | –                                | –              | Caragol et al.              |
| 15             | MSMD                  | <i>IL12RB1</i> | 628-644dup            | 12       | M   | Turkey   | –                   | –                     | –                              | BCG                              | –              | Tanir et al. <sup>g</sup>   |
| 16             | MSMD                  | <i>IL12RB1</i> | 628-644dup            | 3        | M   | Turkey   | –                   | –                     | –                              | –                                | +              | Tanir et al.                |

|    |         |                |                                           |    |   |           |   |   |           |     |   |                                         |
|----|---------|----------------|-------------------------------------------|----|---|-----------|---|---|-----------|-----|---|-----------------------------------------|
| 17 | MSMD    | <i>IL12RB1</i> | Q32X                                      | 12 | F | France    | – | – | –         | BCG | – | Fieschi et al <sup>h</sup>              |
| 18 | MSMD    | <i>IL12RB1</i> | K305X                                     | 29 | F | Morocco   | – | – | <i>St</i> | BCG | – | Fieschi et al.                          |
| 19 | MSMD    | <i>IL12RB1</i> | 700+362_1619-944del                       | 11 | F | Israel    | – | – | –         | –   | – | Scheuerman et al. <sup>i</sup>          |
| 20 | MSMD    | <i>IL12RB1</i> | C198R                                     | 15 | M | Turkey    | – | – | –         | BCG | – | Lichtenauer-Kaligis et al. <sup>j</sup> |
| 21 | MSMD    | <i>IL12RB1</i> | R173P                                     | 14 | M | Turkey    | – | – | <i>Se</i> | –   | – | This report                             |
| 22 | MSMD    | <i>IL12RB1</i> | 1745-46delinsCA/<br>1483+182_1619-1073del | 37 | F | France    | – | – | +         | BCG | – | Fieschi et al.                          |
| 23 | MSMD    | <i>IL12RB1</i> | C198R                                     | 8  | F | Turkey    | – | – | –         | –   | – | This report                             |
| 24 | MSMD    | <i>IL12RB1</i> | C198R                                     | 4  | M | Turkey    | – | – | +         | BCG | – | This report                             |
| 25 | MSMD    | <i>IL12RB1</i> | Y367C                                     | 8  | M | Cameroon  | – | – | <i>Sd</i> | BCG | – | Fieschi et al.                          |
| 26 | MSMD    | <i>IL12RB1</i> | 1791+2T>G                                 | 24 | F | Sri Lanka | – | – | –         | BCG | – | Fieschi et al.                          |
| 27 | CE      | <i>TGFB1</i>   | R218C                                     | 31 | F | France    | – | – | –         | –   | – | Campos-Xavier et al. <sup>k</sup>       |
| 28 | CE      | <i>TGFB1</i>   | R218C                                     | 62 | F | France    | – | – | –         | –   | – | Campos-Xavier et al.                    |
| 29 | CE      | <i>TGFB1</i>   | R218C                                     | 53 | M | France    | – | – | –         | –   | – | Campos-Xavier et al.                    |
| 30 | MLS     | <i>TGFBR1</i>  | K333Q                                     | 7  | F | France    | – | – | –         | –   | – | This report                             |
| 31 | MLS     | <i>TGFBR2</i>  | R537C                                     | 34 | M | France    | – | – | –         | –   | – | Mizuguchi et al. <sup>l</sup>           |
| 32 | MLS     | <i>TGFBR2</i>  | C394W                                     | 41 | F | France    | – | – | –         | –   | – | This report                             |
| 33 | MLS     | <i>TGFBR2</i>  | C394W                                     | 14 | F | France    | – | – | –         | –   | – | This report                             |
| 34 | MLS     | <i>TGFBR2</i>  | C394W                                     | 10 | F | France    | – | – | –         | –   | – | This report                             |
| 35 | AD-HIES | <i>STAT3</i>   | V463del                                   | 34 | F | France    | – | + | –         | –   | – | This report                             |

|    |         |       |         |    |   |          |   |   |   |   |   |             |
|----|---------|-------|---------|----|---|----------|---|---|---|---|---|-------------|
| 36 | AD-HIES | STAT3 | V463del | 8  | M | France   | + | + | - | - | + | This report |
| 37 | AD-HIES | STAT3 | V463del | 9  | F | France   | - | + | - | - | - | This report |
| 38 | AD-HIES | STAT3 | K709E   | 17 | M | France   | - | + | - | - | + | This report |
| 39 | AD-HIES | STAT3 | T412S   | 19 | F | France   | - | + | - | - | - | This report |
| 40 | AD-HIES | STAT3 | V463del | 37 | F | Pakistan | - | + | - | - | + | This report |
| 41 | AD-HIES | STAT3 | V463del | 9  | M | Pakistan | + | + | - | - | + | This report |
| 42 | AD-HIES | STAT3 | K642E   | 36 | M | France   | - | + | - | - | + | This report |
| 43 | AD-HIES | STAT3 | R382W   | 28 | F | France   | - | + | - | - | + | This report |
| 44 | AD-HIES | STAT3 | R382Q   | 19 | M | Turkey   | - | + | - | - | + | This report |
| 45 | AD-HIES | STAT3 | R382W   | 21 | F | France   | + | + | - | - | + | This report |
| 46 | AD-HIES | STAT3 | R382W   | 16 | M | Algeria  | + | + | - | - | + | This report |
| 47 | AD-HIES | STAT3 | R382W   | 23 | M | France   | + | + | - | - | + | This report |
| 48 | AD-HIES | STAT3 | V463del | 28 | M | France   | - | + | - | - | + | This report |
| 49 | AD-HIES | STAT3 | N472D   | 17 | M | France   | - | + | - | - | + | This report |
| 50 | AD-HIES | STAT3 | I665N   | 43 | F | France   | - | + | - | - | + | This report |

---

<sup>a</sup>Shown are Mendelian predisposition to pyogenic bacterial infections (MPPBI), Mendelian susceptibility to mycobacterial diseases (MSMD), Camurati-Engelmann (CE) disease, Marfan-like syndromes (MLS), and AD-HIES.

<sup>b</sup>Infections caused by *Salmonella enteritidis* (*Se*), *Salmonella typhimurium* (*St*), and *Salmonella dublin* (*Sd*).

<sup>c</sup>Infections caused by Bacille Calmette-Guerin (BCG) or by *Mycobacterium tuberculosis* (*Mtb*).

<sup>d</sup>Ku, C.L., H. von Bernuth, C. Picard, S.Y. Zhang, H.H. Chang, K. Yang, M. Chrabieh, A.C. Issekutz, C.K. Cunningham, J. Gallin, et al. 2007. Selective predisposition to bacterial infections in IRAK-4-deficient children: IRAK-4-dependent TLRs are otherwise redundant in protective immunity. *J. Exp. Med.* 204:2407–2422.

<sup>e</sup>Patient 3 suffered from invasive infection caused by *Pseudomonas aeruginosa*.

<sup>f</sup>Caragol, I., M. Raspall, C. Fieschi, J. Feinberg, M.N. Larrosa, M. Hernandez, C. Figueras, J.M. Bertran, J.L. Casanova, and T. Espanol. 2003. Clinical tuberculosis in 2 of 3 siblings with interleukin-12 receptor beta1 deficiency. *Clin. Infect. Dis.* 37:302–306.

<sup>g</sup>Tanir, G., F. Dogu, N. Tuygun, A. Ikinciogullari, C. Aytekin, C. Aydemir, M. Yuksek, E.C. Boduroglu, L. de Beaucoudrey, C. Fieschi, et al. 2006. Complete deficiency of the IL-12 receptor beta1 chain: three unrelated Turkish children with unusual clinical features. *Eur. J. Pediatr.* 165:415–417.

<sup>h</sup>Fieschi, C., S. Dupuis, E. Catherinot, J. Feinberg, J. Bustamante, A. Breiman, F. Altare, R. Baretto, F. Le Deist, S. Kayal, et al. 2003. Low penetrance, broad resistance, and favorable outcome of interleukin 12 receptor  $\beta$ 1 deficiency: medical and immunological implications. *J. Exp. Med.* 197:527–535.

<sup>i</sup>Scheuerman, O., L. de Beaucoudrey, V. Hoffer, J. Feinberg, J.L. Casanova, and B.Z. Garty. 2007. Mycobacterial disease in a child with surface-expressed non-functional interleukin-12Rbeta1 chains. *Isr. Med. Assoc. J.* 9:560–561.

<sup>j</sup>Lichtenauer-Kaligis, E.G., T. de Boer, F.A. Verreck, S. van Voorden, M.A. Hoeve, E. van de Vosse, F. Ersoy, I. Tezcan, J.T. van Dissel, O. Sanal, and T.H. Ottenhoff. 2003. Severe *Mycobacterium bovis* BCG infections in a large series of novel IL-12 receptor beta1 deficient patients and evidence for the existence of partial IL-12 receptor beta1 deficiency. *Eur. J. Immunol.* 33:59–69.

<sup>k</sup>Campos-Xavier, B., J.M. Saraiva, R. Savarirayan, A. Verloes, J. Feingold, L. Faivre, A. Munnich, M. Le Merrer, and V. Cormier-Daire. 2001.

Phenotypic variability at the TGF-beta1 locus in Camurati-Engelmann disease. *Hum. Genet.* 109:653–658.

<sup>l</sup>Mizuguchi, T., G. Collod-Beroud, T. Akiyama, M. Abifadel, N. Harada, T. Morisaki, D. Allard, M. Varret, M. Claustres, H. Morisaki, et al. 2004.

Heterozygous TGFBR2 mutations in Marfan syndrome. *Nat. Genet.* 36:855–860.

**Table S2.** Percentage of CCR6-positive CD4 T cells in controls and STAT-3–deficient patients ex vivo

| <b>Patients and controls<sup>a</sup></b> | <b>Age (yr)</b> | <b>CCR6<sup>+</sup> CCR4<sup>+</sup> CD4<sup>+</sup> T cells (%)</b> | <b>CCR6<sup>+</sup> CCR4<sup>-</sup> CD4<sup>+</sup> T cells (%)</b> |
|------------------------------------------|-----------------|----------------------------------------------------------------------|----------------------------------------------------------------------|
| P 35                                     | 7               | 4.4                                                                  | 0.5                                                                  |
| P 36                                     | 9               | 5.7                                                                  | 0.5                                                                  |
| P 37                                     | 34              | 6.7                                                                  | 1.1                                                                  |
| P 38                                     | 16              | 8.7                                                                  | 7                                                                    |
| P 46                                     | 16              | 8.9                                                                  | 1.4                                                                  |
| Other patient <sup>b</sup>               | 7               | 4.7                                                                  | 2.4                                                                  |
| Other patient <sup>b</sup>               | 15              | 3.1                                                                  | 0.2                                                                  |
| Other patient <sup>b</sup>               | 21              | 4.9                                                                  | 0.5                                                                  |
| C 1                                      | 5               | 7.8                                                                  | 1.5                                                                  |
| C 2                                      | 7               | 6.8                                                                  | 6.5                                                                  |
| C 3                                      | 7               | 6.6                                                                  | 8.8                                                                  |
| C 4                                      | 7               | 11.1                                                                 | 6.2                                                                  |
| C 5                                      | 12              | 16.6                                                                 | 15.2                                                                 |
| C 6                                      | 13              | 6.8                                                                  | 12.2                                                                 |
| C 7                                      | 16              | 8.4                                                                  | 18.5                                                                 |
| C 8                                      | unknown         | 8.3                                                                  | 11.8                                                                 |
| C 9                                      | unknown         | 10.9                                                                 | 20.3                                                                 |

<sup>a</sup>Eight STAT-3–deficient patients (P) and nine healthy controls (C) were studied.

<sup>b</sup>These patients, not described in Table S1, were not studied for IL-17 production.

**Table S3.** Percentage of CD4- and CD8-positive T cells in controls and patients ex vivo

| <b>Patient</b> | <b>Gene</b>    | <b>Age<br/>(yr)</b> | <b>Lymphocytes<br/>(<math>\times 10^9</math> per <math>\mu</math>l)</b> | <b>CD4<sup>+</sup><br/>(%)</b> | <b>CD8<sup>+</sup><br/>(%)</b> |
|----------------|----------------|---------------------|-------------------------------------------------------------------------|--------------------------------|--------------------------------|
| 2              | <i>IRAK4</i>   | 11                  | 4.8                                                                     | 63                             | 17                             |
| 4              | <i>IRAK4</i>   | 10                  | 1.9                                                                     | 45                             | 25                             |
| 6              | <i>IRAK4</i>   | 28                  | 1.3                                                                     | 46                             | 20                             |
| 17             | <i>IL12RB1</i> | 12                  | Not done                                                                | 35                             | 19                             |
| 18             | <i>IL12RB1</i> | 29                  | 1.8                                                                     | 23                             | 37                             |
| 38             | <i>STAT3</i>   | 17                  | 1.3                                                                     | 37                             | 21                             |
| 39             | <i>STAT3</i>   | 19                  | Not done                                                                | 38                             | 33                             |
| 40             | <i>STAT3</i>   | 37                  | 2.9                                                                     | 41                             | 23                             |
| 41             | <i>STAT3</i>   | 9                   | 3.4                                                                     | 31                             | 12                             |
| 42             | <i>STAT3</i>   | 36                  | 0.8                                                                     | 46                             | 20                             |
| 43             | <i>STAT3</i>   | 28                  | 3                                                                       | 28                             | 21                             |
| 45             | <i>STAT3</i>   | 21                  | 2.6                                                                     | 40                             | 34                             |
| 46             | <i>STAT3</i>   | 16                  | 3.3                                                                     | 43                             | 22                             |
| 47             | <i>STAT3</i>   | 23                  | 1.5                                                                     | 35                             | 24                             |
| 49             | <i>STAT3</i>   | 17                  | Not done                                                                | 35                             | 19                             |
| 50             | <i>STAT3</i>   | 43                  | 1                                                                       | 39                             | 21                             |
